# Supplementary material for: Social-behavioral insights in understanding tuberculosis transmission pattern during the COVID-19 pandemic period in Kuala Lumpur, Malaysia: The MyTBNet study protocol
Source: PubMed Central journal article supplement (PMC11426513; doi:10.1371/journal.pone.0307921), 2024-09-26
Supplement: pone.0307921.s001.pdf [file pone.0307921.s001.pdf]

**S1 Table. List of 16 government TB treatment centres by health administrative area in Kuala Lumpur**

| Health administrative area | Num. | Name of TB treatment centre    |
|----------------------------|------|--------------------------------|
| Lembah Pantai              | 1    | Tanglin health clinic          |
|                            | 2    | Petaling Bahagia health clinic |
| Cheras                     | 3    | Cheras health clinic           |
|                            | 4    | Cheras baru health clinic      |
|                            | 5    | Sungai Besi health clinic      |
|                            | 6    | Bandar Tun Razak health clinic |
|                            | 7    | Sungai Besi health clinic      |
|                            | 8    | Salak Selatan health clinic    |
| Kepong                     | 9    | Jinjang health clinic          |
|                            | 10   | Batu health clinic             |
|                            | 11   | Sentul health clinic           |
|                            | 12   | Segambut health clinic         |
| Titiwangsa                 | 13   | Kuala Lumpur health clinic     |
|                            | 14   | Setapak health clinic          |
|                            | 15   | Kampung Pandan health clinic   |
|                            | 16   | Dato' Keramat health clinic    |
